# Supplementary material for: High intensity training during spaceflight: results from the NASA Sprint Study
Source: PubMed Central journal article supplement (PMC7434884; doi:10.1038/s41526-020-00111-x), 2020-08-18
Supplement: 41526_2020_111_MOESM1_ESM.pdf [file 41526_2020_111_MOESM1_ESM.pdf]

**Supplementary Table 1.** Descriptive data for aerobic exercise training parameters on CEVIS and T2 during long-duration spaceflight with traditional exercise or Sprint exercise prescription

|                                  | CEVIS  |        | T2     |        |
|----------------------------------|--------|--------|--------|--------|
|                                  | CON    | SPRINT | CON    | SPRINT |
| Volume (min•week <sup>-1</sup> ) | 78±33  | 55±15  | 87±31  | 81±27  |
| 30 s interval                    |        |        |        |        |
| peak HR (b•min <sup>-1</sup> )   | NA     | 165±9  | 156±14 | 167±15 |
| peak HR (% maximum)              | NA     | 86.4   | 90.8   | 93.1   |
| 2 min interval                   |        |        |        |        |
| peak HR (b•min <sup>-1</sup> )   | 158±11 | 166±11 | 158±9  | 163±25 |
| peak HR (% maximum)              | 92.3   | 92.7   | 91.7   | 90.9   |
| 4 min interval                   |        |        |        |        |
| peak HR (b•min <sup>-1</sup> )   | 156±12 | 164±19 | 156±8  | 169±11 |
| peak HR (% maximum)              | 90.8   | 90.6   | 89.0   | 93.8   |
| Continuous                       |        |        |        |        |
| peak HR (b•min <sup>-1</sup> )   | 151±12 | 151±11 | 145±16 | 154±21 |
| peak HR (% maximum)              | 88.1   | 84.4   | 85.1   | 86.0   |

Data are mean±SD. CEVIS = cycle ergometer with vibration isolation system; T2 = second generation treadmill; CON = control group that performed the ISS standard of care exercise prescription; SPRINT = experimental group that performed a high intensity/lower volume exercise prescription; HR = heart rate.

**Supplementary Table 2.** Descriptive data for resistance exercise training parameters during long-duration spaceflight with traditional exercise or Sprint exercise prescription

|                                      | Squat  |        | Heel Raise |        | Deadlift |        |
|--------------------------------------|--------|--------|------------|--------|----------|--------|
|                                      | CON    | SPRINT | CON        | SPRINT | CON      | SPRINT |
| Load (kg)                            | 89.9   | 95.3   | 115.8      | 133.3  | 85.3     | 91.3   |
| Repetitions•week <sup>-1</sup>       | 193.1  | 104.1  | 200.8      | 108.6  | 287.9    | 171.4  |
| Volume load (kg•week <sup>-1</sup> ) | 17,014 | 9,613  | 22,946     | 13,871 | 22,917   | 15,074 |

Data are means. Volume load = sets × repetitions × load. “Squat” represents: back squat, single leg squat, and sumo squat; “heel raise” represents: heel raise and single leg heel raise; “deadlift” represents: deadlift, Romanian deadlift, and sumo deadlift. CON = control group that performed the ISS standard of care exercise prescription; SPRINT = experimental group that performed a high intensity/lower volume exercise prescription.

**Supplementary Table 3.** Sprint aerobic exercise prescriptions

| <b>Work time</b> | <b>Repetitions</b> | <b>Intensity (% VO<sub>2peak</sub>)</b> | <b>Rest</b> |
|------------------|--------------------|-----------------------------------------|-------------|
| 30 min           | 1                  | 75                                      | NA          |
| 4 min            | 4                  | 90                                      | 3 min       |
| 2 min            | 6                  | 70, 80, 90, 100, 90, 80                 | 2 min       |
| 30 s             | 8                  | 100                                     | 15 s        |

**Supplementary Table 4.** Sample 12-week Sprint resistance exercise prescription with exercises and load

|                  | <b>Day 1</b>                                | <b>Day 2</b>                            | <b>Day 3</b>                                                          |
|------------------|---------------------------------------------|-----------------------------------------|-----------------------------------------------------------------------|
| <b>Exercises</b> | <b>Squat, Heel Raise, Romanian Deadlift</b> | <b>Sumo Squat, Heel Raise, Deadlift</b> | <b>Single-leg Squat, Heel Raise, Romanian Deadlift, Sumo Deadlift</b> |
| Week 1           | Low                                         | Low                                     | Low                                                                   |
| 2                | Low                                         | Low                                     | Low                                                                   |
| 3                | Moderate                                    | Low                                     | High                                                                  |
| 4                | High                                        | Moderate                                | Low                                                                   |
| 5                | Low                                         | High                                    | Moderate                                                              |
| 6                | Moderate                                    | Low                                     | High                                                                  |
| 7                | High                                        | Moderate                                | Low                                                                   |
| 8                | Low                                         | High                                    | Moderate                                                              |
| 9                | Moderate                                    | Low                                     | High                                                                  |
| 10               | High                                        | Moderate                                | Low                                                                   |
| 11               | Low                                         | High                                    | Moderate                                                              |
| 12               | Moderate                                    | Low                                     | High                                                                  |

Low load = 4 sets of 12 repetitions; Moderate load = 4 sets of 8 repetitions; High load = 4 sets of 6 repetitions. Sprint crewmembers performed resistance exercise 3 days/week. On a typical 6-month mission, crewmembers completed this 12-week cycle twice, although Weeks 1 and 2 (familiarization) were not repeated.

**Supplementary Table 5.** Sample 12-week resistance exercise prescription completed by control subjects with exercises and load

| Exercises | Days 1,6,8                                     | Days 2,4,9                       | Days 3,5,7                                         |
|-----------|------------------------------------------------|----------------------------------|----------------------------------------------------|
|           | Squat, Heel Raise, Deadlift, Romanian Deadlift | Sumo Squat, Heel Raise, Deadlift | Single-leg Squat, Sumo Deadlift, Romanian Deadlift |
| Weeks 1-3 | Low                                            | Low                              | Low                                                |
| 3-4       | High                                           | Low                              | Moderate                                           |
| 4-5       | Moderate                                       | High                             | Low                                                |
| 5-6       | Low                                            | Moderate                         | High                                               |
| 6-7       | High                                           | Low                              | Moderate                                           |
| 7-8       | Moderate                                       | High                             | Low                                                |
| 8-9       | Low                                            | Moderate                         | High                                               |
| 9-10      | High                                           | Low                              | Moderate                                           |
| 10-11     | Moderate                                       | High                             | Low                                                |
| 11-12     | Low                                            | Moderate                         | High                                               |
| 12        | High                                           | Low                              | Moderate                                           |

Low load = 4 sets of 12 repetitions; Moderate load = 4 sets of 8 repetitions; High load = 4 sets of 6 repetitions; heel raise was prescribed as 4 sets × 20 repetitions. Control crewmembers performed resistance exercise 6 days per week with a 9-day rotation. On a typical 6-month mission, crewmembers completed this 12-week mesocycle twice.
